# Supplementary material for: Rapid one-step scalable microwave synthesis of Ti3C2Tx MXene
Source: Royal Society of Chemistry journal article supplement (doi:10.1039/d1cc04989e), 2021-01-01
Supplement: d1cc04989e1.pdf [file d1cc04989e1.pdf]

## Supplementary Information

### Rapid one-step scalable microwave synthesis of $Ti_3C_2T_x$ MXene

Jing Zhu, Jingyi Zhang, Ruiming Lin, Benwei Fu, Chengyi Song, Wen Shang, Peng Tao\*, and Tao Deng\*

State Key Laboratory of Metal Matrix Composites, School of Materials Science and Engineering, Shanghai Jiao Tong University, Shanghai, 200240, China

\*Email: [taopeng@sjtu.edu.cn](mailto:taopeng@sjtu.edu.cn); [dengtao@sjtu.edu.cn](mailto:dengtao@sjtu.edu.cn)

## Experimental Section

### Materials

$Ti_3AlC_2$  powders (99.8%, 400 mesh) were purchased from Xiyan technology (Shandong) co. LTD, China. HCl (36.0~38.0%) was ordered from Sinopharm (Shanghai) and LiF was ordered from Meryer (Shanghai). All chemical reagents were of analytical grade. Deionized (DI) water was used to prepare the corresponding reaction solution.

### Synthesis of $Ti_3C_2T_x$

The  $Ti_3C_2T_x$  was synthesized by one-step microwave heating of the  $Ti_3AlC_2$  powders within the HCl/LiF aqueous solution. DI water was added to HCl (12M) to prepare a diluted 9M HCl solution, and 20 ml of the dilute HCl solution was then transferred into a Teflon vessel. After that, 1.6 g of LiF was slowly added to this solution. The mixture was magnetically stirred for 5 min until the LiF was fully dissolved. In a typical process, 1 g of  $Ti_3AlC_2$  powder was slowly added into this solution. The mixture was then placed

within a household microwave oven under an irradiation power of 200 W. The reaction mixture was irradiated for 5 min and then was cooled down for 1 min. The whole heating/cooling process was repeated three times. The obtained products were washed with DI water by repeated centrifugation at 3500 rpm for 5 min until the pH of supernatant reached 6~7. After centrifugation, aqueous dispersion was sonicated in an ice bath for 1 h and 3 h, respectively. The resultant dispersion was centrifuged at 3500 rpm for 20 min and the supernatant was collected.

## **Characterization**

The morphologies of  $Ti_3AlC_2$  and  $Ti_3C_2T_x$  were characterized by using the scanning electron microscope (SEM, RISE-MAGNA) and the transmission electron microscope (TEM, TALOS F200X). AFM characterization was performed on the Bruker Multimode 8 system. XPS analyses were carried out by using an AXIS Ultra DLD X-ray photoelectron spectrometer under a chamber pressure of  $10^{-10}$  mbar. The X-ray source is generated by an Al anode (1486.7 eV). X-ray diffraction was performed on the Bruker D4 diffractometer with Ni-filtered Cu  $K\alpha$  radiation ( $\lambda=1.5406 \text{ \AA}$ ).

## **Photothermal performance of $Ti_3C_2T_x$ nanosheets**

The near-infrared (NIR) photothermal experiments were carried out by illuminating a glass vial (1 cm in diameter) containing 0.5 ml of  $Ti_3C_2T_x$  nanosheets dispersion (0.125, 0.1, 0.05, 0.02 and 0.01 mg/ml) with 808-nm laser (Shanghai Connect Fiber Optics Company). The glass vial is placed within a thermal insulative polystyrene foam during the illumination process. The temperature evolution profiles of the irradiated aqueous dispersion were recorded by a data acquisition instrument (Agilent).

## **Calculation of extinction coefficient**

According to the Lambert-Beer Law:

$$A(\lambda) = \alpha LC \quad (1)$$

where  $A$  is the absorbance at the wavelength  $\lambda$ ,  $\alpha$  is the extinction coefficient,  $L$  is optical path length (1 cm), and  $C$  is the concentration of the  $\text{Ti}_3\text{C}_2\text{T}_x$  nanosheets (g/L). To obtain the extinction coefficient  $\alpha$  of  $\text{Ti}_3\text{C}_2\text{T}_x$  nanosheets in 808 nm, the dependence of  $A/L$  on  $C$  is linearly fitted and the slope of the fitted curve yields  $\alpha$  ( $\text{L} \cdot \text{g}^{-1} \cdot \text{cm}^{-1}$ ).

## Calculation of photothermal conversion efficiency

The overall energy balance for the dispersion system can be expressed as:

$$\sum_i m_i C_{p,i} \frac{dT}{dt} = Q_{\text{Ti}_3\text{C}_2\text{T}_x} + Q_{\text{Base}} - Q_{\text{Surr}} \quad (2)$$

where  $m$  and  $C$  are the mass and heat capacity of water,  $T$  is the solution temperature,  $Q_{\text{Ti}_3\text{C}_2\text{T}_x}$  is the photothermal energy input from  $\text{Ti}_3\text{C}_2\text{T}_x$  nanosheets,  $Q_{\text{Base}}$  is the baseline energy input from the solvent after laser illumination, and  $Q_{\text{Surr}}$  is the heat lost from the illuminated solution to surrounding air.

The 808-nm laser induced strong localized plasmon resonance effect on the surface of  $\text{Ti}_3\text{C}_2\text{T}_x$ . The generated photothermal energy can be calculated by:

$$Q_{\text{Ti}_3\text{C}_2\text{T}_x} = I(1 - 10^{-A_{808}})\eta \quad (3)$$

where  $I$  is the illumination laser power (mW),  $A_{808}$  is the absorbance of the  $\text{Ti}_3\text{C}_2\text{T}_x$  nanosheets at the wavelength of 808 nm, and  $\eta$  is the photothermal conversion efficiency.

Water can also absorb NIR light and convert it into heat. The heat gain by water during the NIR illumination ( $Q_{\text{Base}}$ ) can be estimated by:

$$Q_{\text{Base}} = mC(T - T_{\text{surr}}) \quad (4)$$

where  $m$  is the mass of the water solvent (0.5 g),  $C$  is its heat capacity (4.2 J/g),  $T$  is the solution temperature, and  $T_{\text{Surr}}$  is the surrounding temperature.

In the meanwhile, the illuminated solution loses part of heat mainly through convection to the surrounding air. The heat loss ( $Q_{\text{Surr}}$ ) can be calculated by:

$$Q_{\text{Surr}} = hS(T - T_{\text{Surr}}) \quad (5)$$

where  $h$  is heat transfer coefficient,  $S$  is the surface area of the vial.

Under a fixed laser illumination power, the system temperature will rise to a maximum value ( $T_{Max}$ ) when the heat input ( $Q_{Ti_3C_2T_x} + Q_{Base}$ ) is equal to the heat output ( $Q_{Surr}$ ).

$$Q_{Ti_3C_2T_x} + Q_{Base} = Q_{Surr - Max} = hS(T_{Max} - T_{Surr}) \quad (6)$$

By rearranging Equation (3) and Equation (6), the laser photothermal conversion efficiency ( $\eta$ ) of  $Ti_3C_2T_x$  at 808 nm can be obtained:

$$\eta = \frac{hS(T_{Max} - T_{Surr}) - Q_{Base}}{I(1 - 10^{-A_{808}})} \quad (7)$$

By independently using a sample containing pure water (0.5 ml),  $Q_{Base}$  was measured to be 1.1512 mW. The  $T_{Surr}$  and  $T_{Max}$  were measured to be 17 °C and 69.8°C, respectively. In addition, the absorbance of  $Ti_3C_2T_x$  nanosheets at 808 nm is 1.2113,  $I$  is 735 mW.

To get the  $hS$ , a dimensionless constant  $\theta$  was used:

$$\theta = \frac{T - T_{Surr}}{T_{Max} - T_{Surr}} \quad (8)$$

and a sample system time constant  $\tau_s$  was defined as:

$$\tau_s = \frac{\sum_i m_i C_{p,i}}{hS} \quad (9)$$

By substituting (8) and (9) into Equation (2), the following equation can be obtained:

$$\frac{d\theta}{dt} = \frac{1}{\tau_s} \left[ \frac{Q_{Ti_3C_2T_x} + Q_{Base}}{hS(T_{Max} - T_{Surr})} - \theta \right] \quad (10)$$

When the laser was shut off, the heat input ( $Q_{Ti_3C_2T_x} + Q_{Base}$ ) was zero and the system cooled down, the following dependence can be obtained:

$$dt = -\tau_s \frac{d\theta}{\theta} \quad (11)$$

Integrating Equation (11) yields the following expression:

$$t = -\tau_s \ln(\theta) \quad (12)$$

Figure S6a depicts the temperature evolution profile when the  $Ti_3C_2T_x$  dispersion

was illuminated by the 808-nm laser ( $1.5 \text{ W/cm}^2$ ) for 480 s followed by natural cooling. By linearly fitting the dependence of  $t$  versus  $-\ln\left(\frac{T-T_c}{T_0-T_c}\right)$  at the cooling stage, the slope of the fitted curve (Figure S6b) yields  $\tau_s$  (331). According to Equation (9), the  $hS$  was calculated to be  $6.35 \text{ mW/}^\circ\text{C}$ . By substituting this value of  $hS$  into Equation (7), the photothermal conversion efficiency ( $\eta$ ) of  $\text{Ti}_3\text{C}_2\text{T}_x$  nanosheets at 808 nm was calculated to be 48.7%.

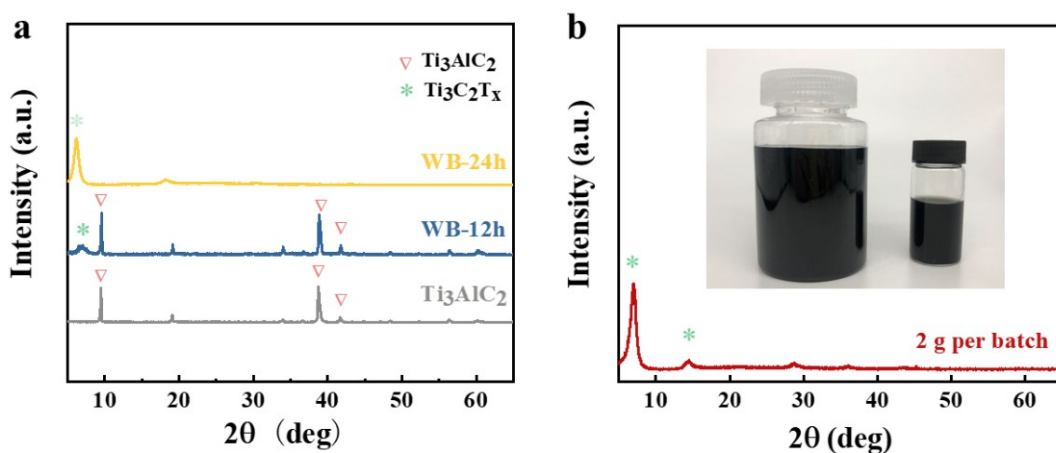

**Fig. S1** (a) XRD patterns of  $\text{Ti}_3\text{AlC}_2$  and the products etched for 12 h, 24 h by the typical water bath synthetic method. (b) XRD pattern of  $\text{Ti}_3\text{C}_2\text{T}_x$  when the microwave synthesis is scaled to 2 g per batch. The inset images show stable aqueous dispersion of the obtained  $\text{Ti}_3\text{C}_2\text{T}_x$  (0.1 g and 2 g per batch).

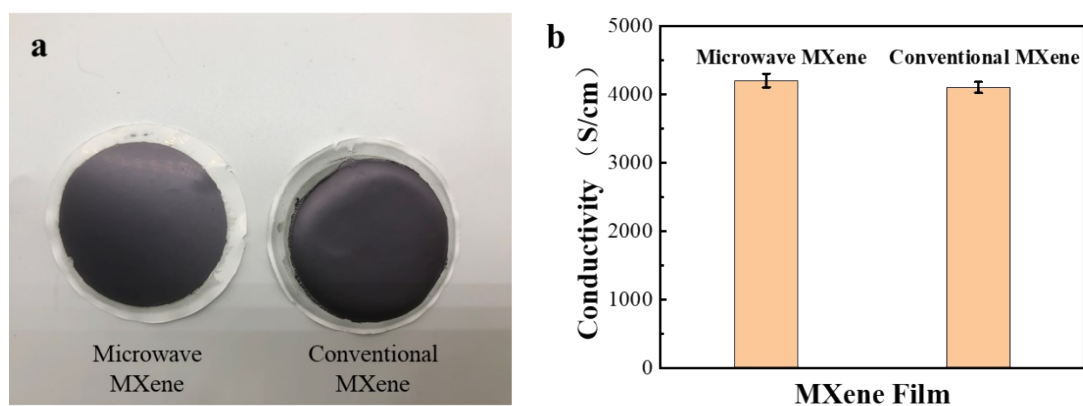

**Fig. S2** (a) Photograph of MXene films prepared through vacuum filtration and drying. (b) Comparison of electrical conductivity of microwave-synthesized and conventional heating-synthesized MXene films.

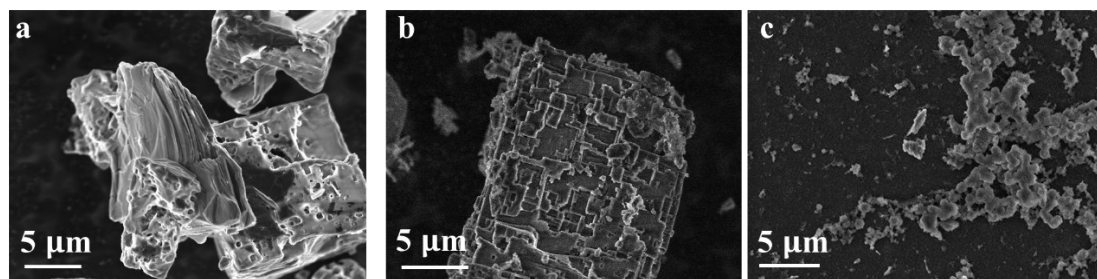

**Fig. S3** SEM images of etched products when the microwave power is (a) 400 W, (b) 600 W and (c) 800 W.

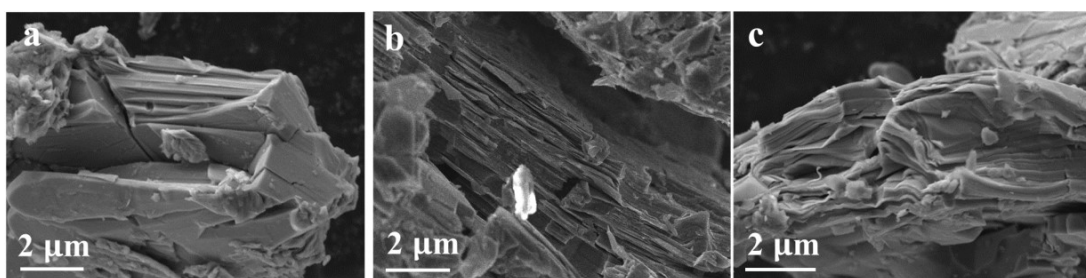

**Fig. S4** SEM images of the etched products when the concentration of HCl is (a) 6 M, (b) 9 M, (c) 12 M.

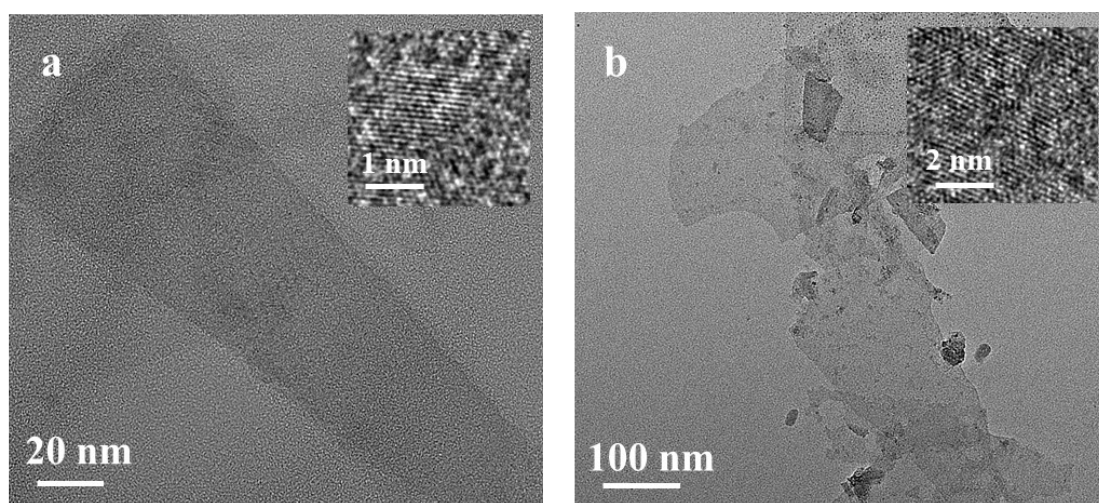

**Fig. S5** (a, b) TEM images of  $\text{Ti}_3\text{C}_2\text{T}_x$  prepared by the microwave heating method. The inset is the corresponding HR-TEM image.

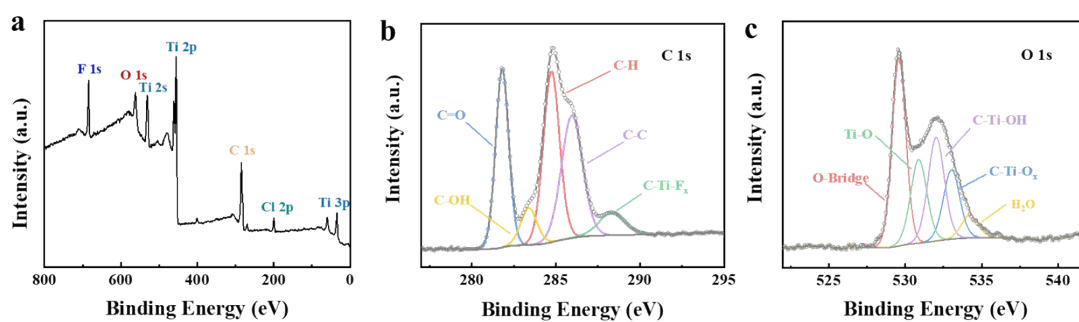

**Fig. S6** (a) XPS survey spectrum of  $\text{Ti}_3\text{C}_2\text{T}_x$  powders. High resolution XPS spectra of (b) C 1s and (c) O 1s.

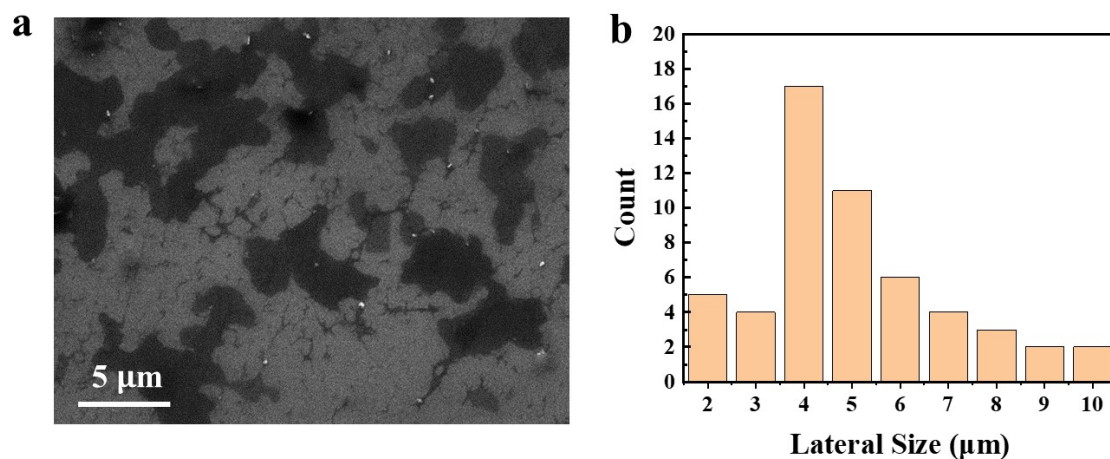

**Fig. S7** (a) SEM image of  $\text{Ti}_3\text{C}_2\text{T}_x$  sheets after sonicating the etched products for 1 h. (b) Lateral size distribution of the  $\text{Ti}_3\text{C}_2\text{T}_x$  sheets after sonication for 1 h.

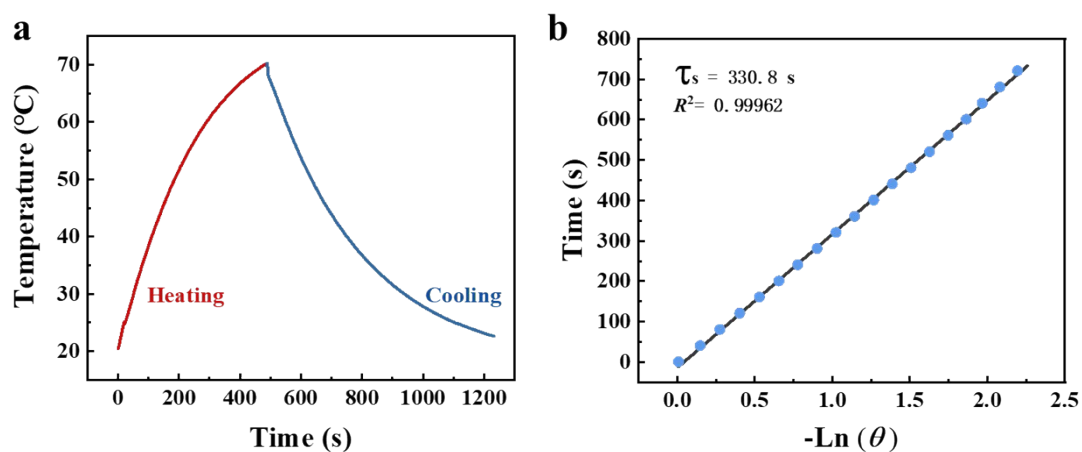

**Fig. S8** (a) Temperature profile of aqueous dispersion of  $\text{Ti}_3\text{C}_2\text{T}_x$  nanosheets (0.02 mg/ml) under illumination of a NIR laser (808 nm,  $1.5 \text{ W/cm}^2$ ). The laser was turned on for 480 s, and then the laser was turned off for natural cooling. (b) Linear fitting  $t$  with  $-\text{Ln}(\theta)$  during natural cooling.



**Table. S1** XPS peak fitting results of Ti 2p, C1s and O1s for microwave-synthesized Ti<sub>3</sub>C<sub>2</sub>T<sub>x</sub>

| Region    | Position | FWHM | %content | Assigned to         |
|-----------|----------|------|----------|---------------------|
| Ti 2p 3/2 | 455.31   | 1.75 | 53.59    | Ti-C                |
|           | 456.91   | 1.58 | 25.86    | Ti(ii)              |
|           | 458.59   | 1.58 | 14.85    | Ti(iii)             |
|           | 460.84   | 1.58 | 5.70     | TiO <sub>2</sub>    |
| C 1s      | 281.81   | 0.9  | 26.25    | C-Ti                |
|           | 283.39   | 1.13 | 6.76     | C-Ti-O              |
|           | 284.74   | 1.13 | 31.24    | C-C                 |
|           | 285.95   | 1.47 | 29.16    | C-O                 |
|           | 288.33   | 1.8  | 6.58     | C=O                 |
| O 1s      | 529.59   | 1.04 | 35.97    | O-Bridge            |
|           | 530.88   | 1.25 | 19.14    | C-Ti-O <sub>x</sub> |
|           | 532.02   | 1.25 | 23.77    | Ti-O                |
|           | 533.02   | 1.25 | 15.84    | C-Ti-OH             |
|           | 534.22   | 1.25 | 5.28     | TiO <sub>2</sub>    |
